# Supplementary material for: A MITE-based genotyping method to reveal hundreds of DNA polymorphisms in an animal genome after a few generations of artificial selection
Source: Springer Nature journal article supplement (doi:10.1186/1471-2164-9-459), 2008-01-01
Supplement: Additional file 1 [file 1471-2164-9-459-s1.doc]

## Additional file 1 - Enzyme combinations tested to implement the traditional DArT protocol on the genome of *Aedes aegypti*

| **Complexity reduction method** | **Enzyme combination*** | **Adaptors sequence (5' - 3')** | | **PCR primer(s) (5' - 3')** |
| --- | --- | --- | --- | --- |
| **First strand** | **Second strand** |
| #1 | PstI + AluI | CACGATGGATCCAGTGCA | CTGGATCCATCGTGCA | GATGGATCCAGTGCAG |
| #2 | PstI + BanII | Same as above | Same as above | Same as above |
| #3 | PstI + BsoBI | Same as above | Same as above | Same as above |
| #4 | PstI + BstNI | Same as above | Same as above | Same as above |
| #5 | PstI + MseI | Same as above | Same as above | Same as above |
| #6 | PstI + RsaI | Same as above | Same as above | Same as above |
| #7 | Pst + TaqI | Same as above | Same as above | Same as above |
| #8 | PstI + Tsp509I | Same as above | Same as above | Same as above |
